# Supplementary material for: Diet quality and telomere length in older Australian men and women
Source: PubMed Central journal article supplement (PMC5847066; doi:10.1007/s00394-016-1326-6), 2016-10-26
Supplement: 394_2016_1326_MOESM1_ESM.pdf [file 394_2016_1326_MOESM1_ESM.pdf]

Title: Diet quality and telomere length in older Australian men and women

Journal title: European Journal of Nutrition

Catherine M Milte, Aaron P Russell, Kylie Ball, David Crawford, Jo Salmon and Sarah A McNaughton

*Centre for Physical Activity and Nutrition Research, School of Exercise and Nutrition Sciences, Deakin University, Geelong, Victoria, Australia*

Email: [catherine.milte@deakin.edu.au](mailto:catherine.milte@deakin.edu.au)

S1. Median and mean (SD) daily equivalent intake frequencies of food groups from the MDS of 679 Men and Women from the WELL Study by quartile of relative telomere length, Victoria, Australia, 2012.

|                | Total  |             | Q1     |             | Q2     |             | Q3     |             | Q4     |             |
|----------------|--------|-------------|--------|-------------|--------|-------------|--------|-------------|--------|-------------|
|                | Median | Mean (SD)   | Median | Mean (SD)   | Median | Mean (SD)   | Median | Mean (SD)   | Median | Mean (SD)   |
| Vegetables     | 5.55   | 5.97 (3.15) | 5.16   | 5.93 (3.81) | 5.60   | 5.90 (2.70) | 5.39   | 5.49 (2.23) | 5.99   | 6.54 (3.55) |
| Legumes        | 0.07   | 0.17 (0.34) | 0.67   | 0.21 (0.52) | 0.67   | 0.16 (0.21) | 0.67   | 0.15 (0.27) | 0.67   | 0.17 (0.27) |
| Fruit and nuts | 3.28   | 3.72 (2.57) | 3.34   | 3.75 (2.56) | 3.27   | 3.72 (2.61) | 2.92   | 3.51 (2.48) | 3.49   | 3.90 (2.64) |
| Cereals        | 1.92   | 2.11 (1.16) | 2.07   | 2.13 (1.11) | 1.86   | 2.09 (1.18) | 2.14   | 2.22 (1.11) | 1.85   | 1.99 (1.24) |
| Fish           | 0.28   | 0.38 (0.35) | 0.29   | 0.41 (0.38) | 0.28   | 0.37 (0.29) | 0.21   | 0.36 (0.34) | 0.28   | 0.39 (0.36) |
| Dairy          | 1.64   | 1.83 (1.18) | 1.71   | 1.90 (1.16) | 1.56   | 1.71 (1.15) | 1.74   | 1.94 (1.20) | 1.63   | 1.78 (1.19) |
| Meat           | 0.78   | 0.91 (0.67) | 0.84   | 0.99 (0.83) | 0.77   | 0.89 (0.57) | 0.84   | 0.95 (0.67) | 0.76   | 0.82 (0.54) |
| Alcohol        | 0.50   | 0.75 (0.92) | 0.56   | 0.87 (1.10) | 0.50   | 0.69 (0.76) | 0.43   | 0.74 (0.98) | 0.50   | 0.71 (0.79) |
| MDS            | 4      | 4.25 (1.56) | 4      | 4.28 (1.52) | 4      | 4.34 (1.64) | 4      | 4.04 (1.60) | 4      | 4.34 (1.45) |

MDS, Mediterranean diet score; WELL, Wellbeing, Eating and Exercise for a Long Life
