# Supplementary material for: Diet quality and telomere length in older Australian men and women
Source: Springer Nature journal article supplement (doi:10.1007/s00394-016-1326-6), 2016-10-26
Supplement: MOESM2 [file 10990856]

Title: Diet quality and telomere length in older Australian men and women

Journal title: European Journal of Nutrition

Catherine M Milte, Aaron P Russell, Kylie Ball, David Crawford, Jo Salmon and Sarah A McNaughton

*Centre for Physical Activity and Nutrition Research, School of Exercise and Nutrition Sciences, Deakin University, Geelong, Victoria, Australia*

Email: [catherine.milte@deakin.edu.au](mailto:catherine.milte@deakin.edu.au)

S2. Characteristics of Men and Women from the WELL Study included and excluded from analysis, Victoria, Australia, 2012.

|                                       | Included<br>(n=679) | Excluded<br>(n=3403) |         |
|---------------------------------------|---------------------|----------------------|---------|
|                                       | Mean (SD)           | Mean (SD)            | P value |
| Age                                   | 62.7 (3.07)         | 62.7 (3.13)          | 0.72    |
| BMI <sup>b</sup>                      | 26.7 (4.94)         | 27.2 (5.07)          | 0.01    |
| Total physical activity <sup>ab</sup> | 97.2 (84.2)         | 112.8 (99.9)         | >0.001  |
|                                       | n (%)               | n (%)                |         |
| Sex, men                              | 322 (47.4)          | 1622 (47.7)          | 0.91    |
| Smoking <sup>b</sup>                  |                     |                      |         |
| Never smoked                          | 396 (58.3)          | 1019 (49.3)          | >0.001  |
| Former smoker                         | 228 (33.6)          | 854 (41.3)           |         |
| Daily smoker                          | 55 (8.1)            | 193 (9.3)            |         |
| Country of birth <sup>b</sup>         |                     |                      |         |
| Australia                             | 515 (75.9)          | 1719 (82.6)          | 0.75    |
| UK                                    | 54 (8.0)            | 142 (6.8)            |         |
| Other                                 | 109 (16.1)          | 213 (10.2)           |         |
| Marital status                        |                     |                      |         |
| Married/defacto <sup>b</sup>          | 520 (76.6)          | 1612 (77.5)          | 0.747   |
| Separated/ divorced                   | 79 (11.6)           | 250 (12.0)           |         |
| Widowed                               | 38 (5.6)            | 104 (5.0)            |         |
| Never married                         | 40 (5.9)            | 103 (5.0)            |         |
| Education <sup>b</sup>                |                     |                      |         |
| Up to 10 yrs                          | 165 (24.3)          | 1319 (39.7)          | >0.001  |

|                            |            |             |
|----------------------------|------------|-------------|
| 12 yrs/ trade/ certificate | 232 (34.2) | 1204 (36.2) |
| University degree          | 282 (41.5) | 803 (24.1)  |

---

BMI, body mass index; WELL, Wellbeing, Eating and Exercise for a Long Life.

<sup>a</sup>Reported as MET hours per week. <sup>b</sup>Reduced sample size for variables due to missing data.
